# Supplementary figures and images for: Dopamine neurons drive fear extinction learning by signaling the omission of expected aversive outcomes
Source: eLife journal article supplement (doi:10.7554/elife.38818), 2018-11-13

**Figure 1—figure supplement 1**

**A**

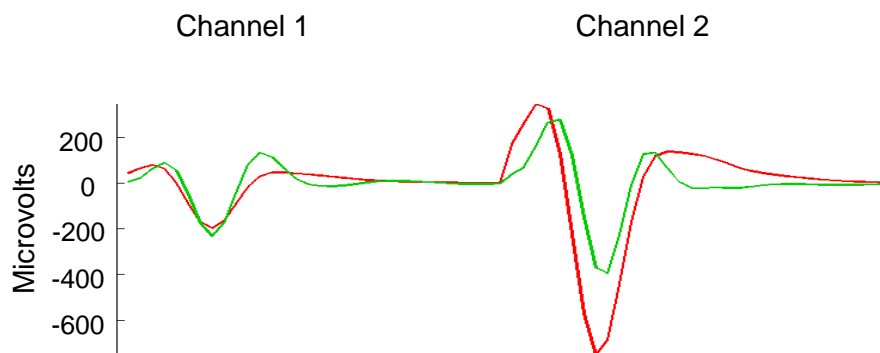

**B**

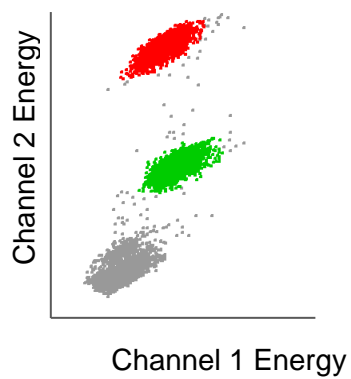

**C**

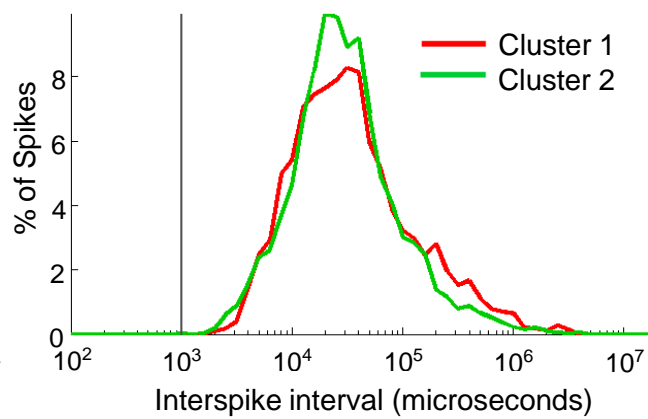

Supplement: supp [file elife-38818-supp-v1.zip]

**Figure 3—figure supplement 1**

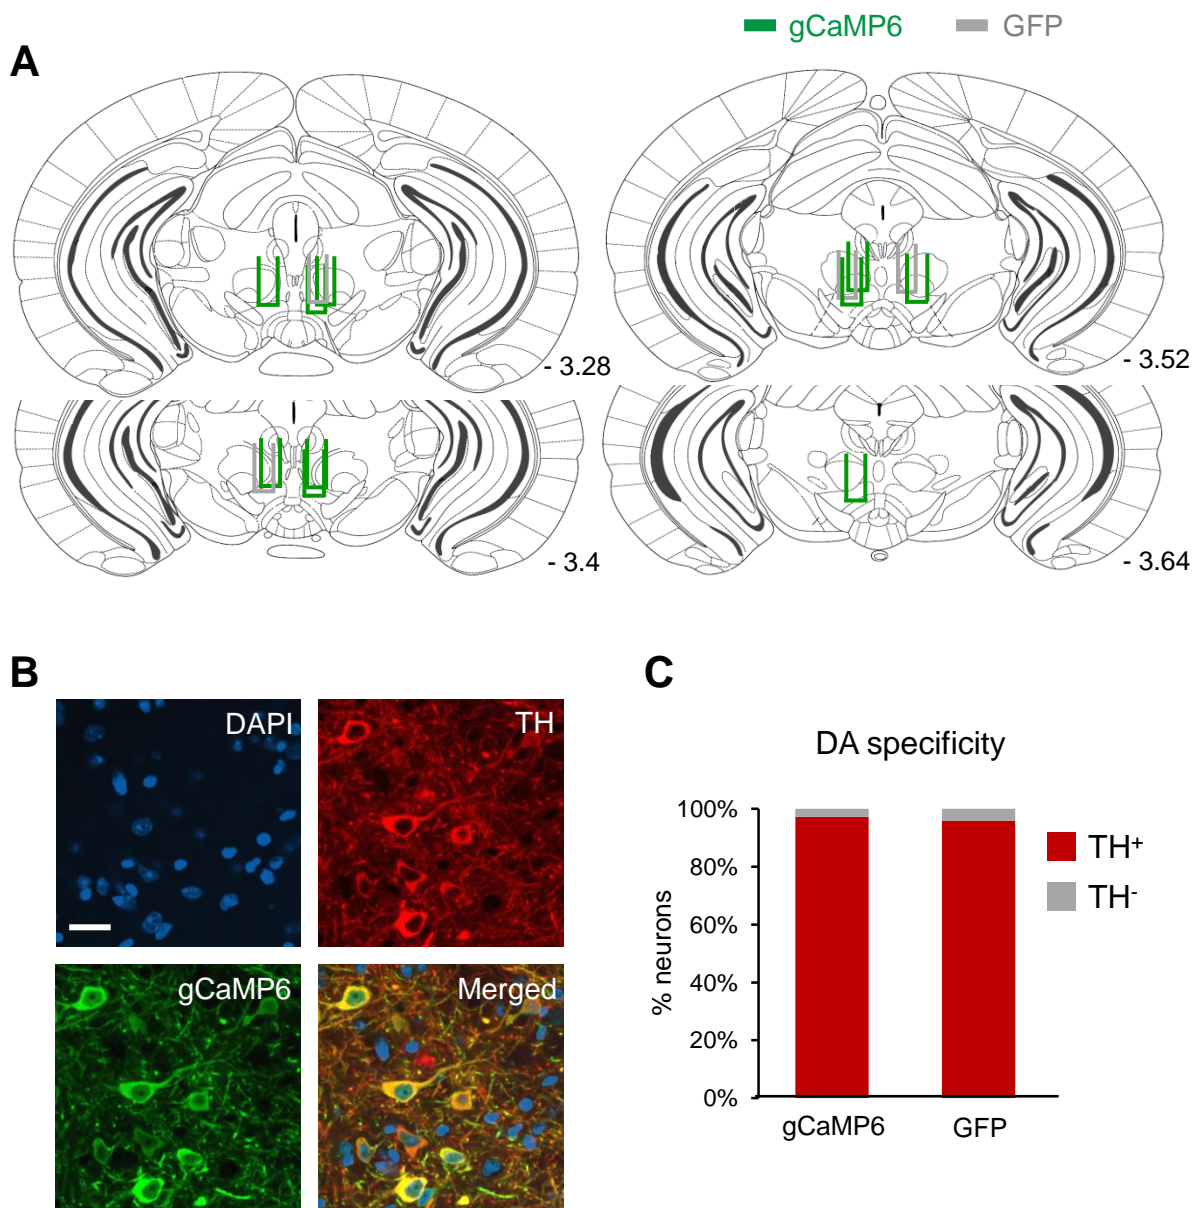

Supplement: supp [file elife-38818-supp-v1.zip]

**Figure 6—figure supplement 2**

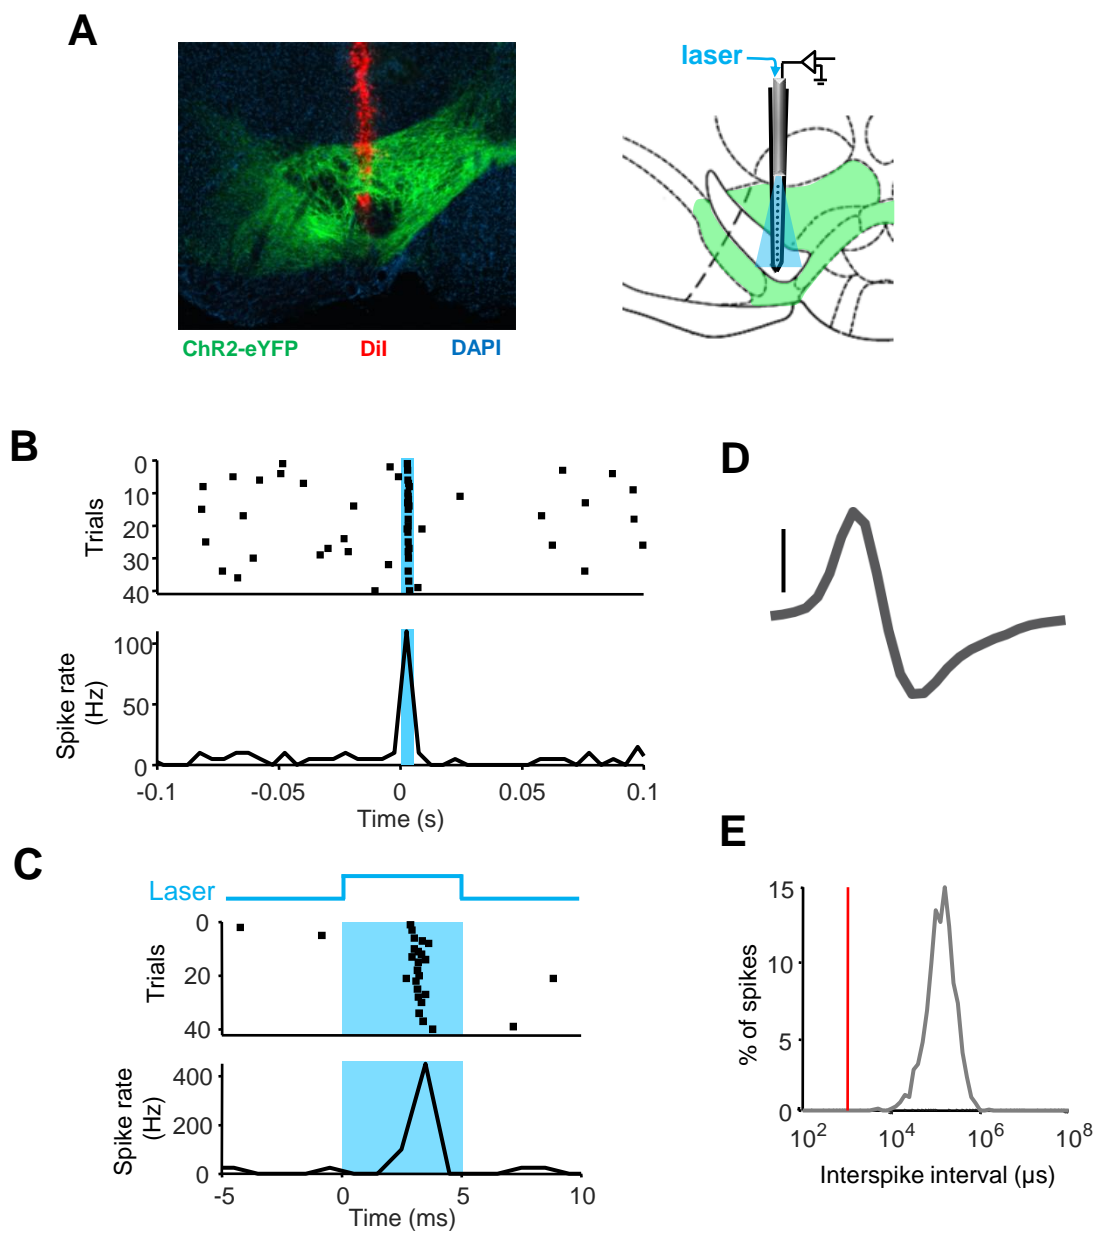

Supplement: supp [file elife-38818-supp-v1.zip]

**Figure 3—figure supplement 2**

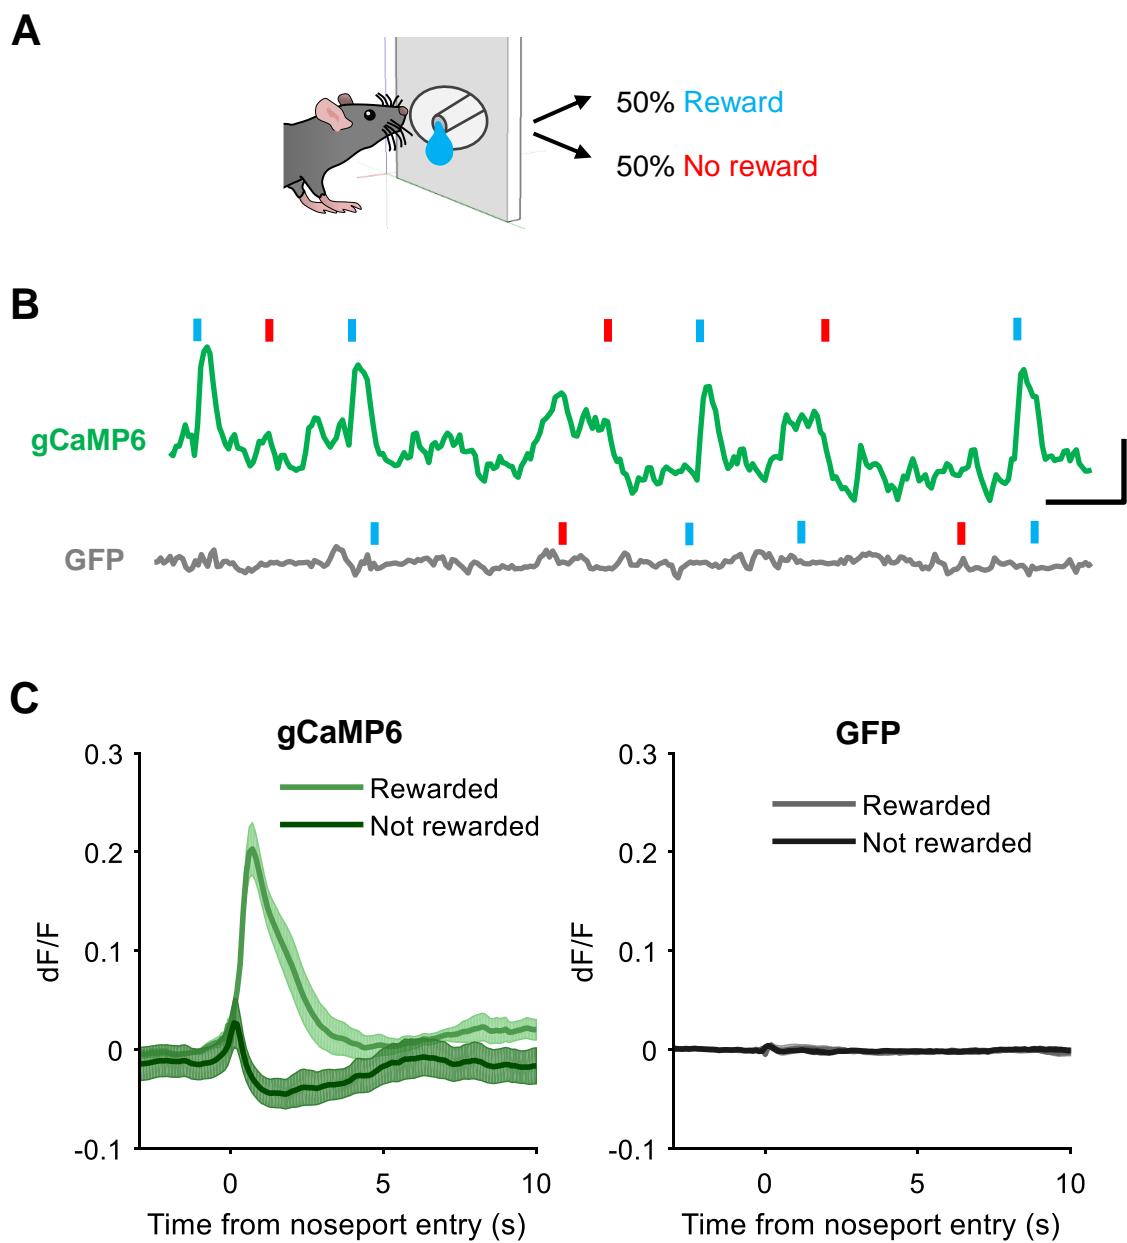

Supplement: supp [file elife-38818-supp-v1.zip]

**Figure 3—figure supplement 3**

**A**

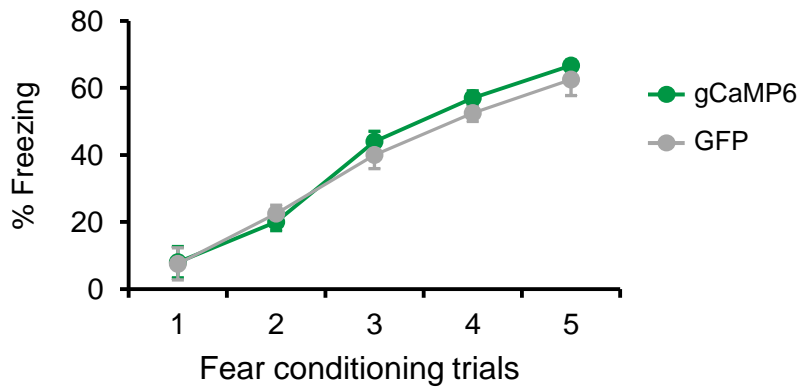

**B**

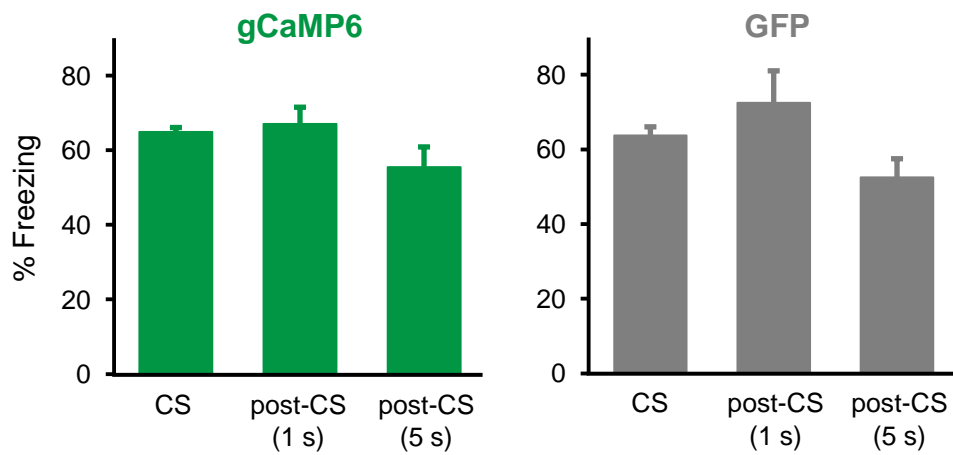

Supplement: supp [file elife-38818-supp-v1.zip]

**Figure 1—figure supplement 2**

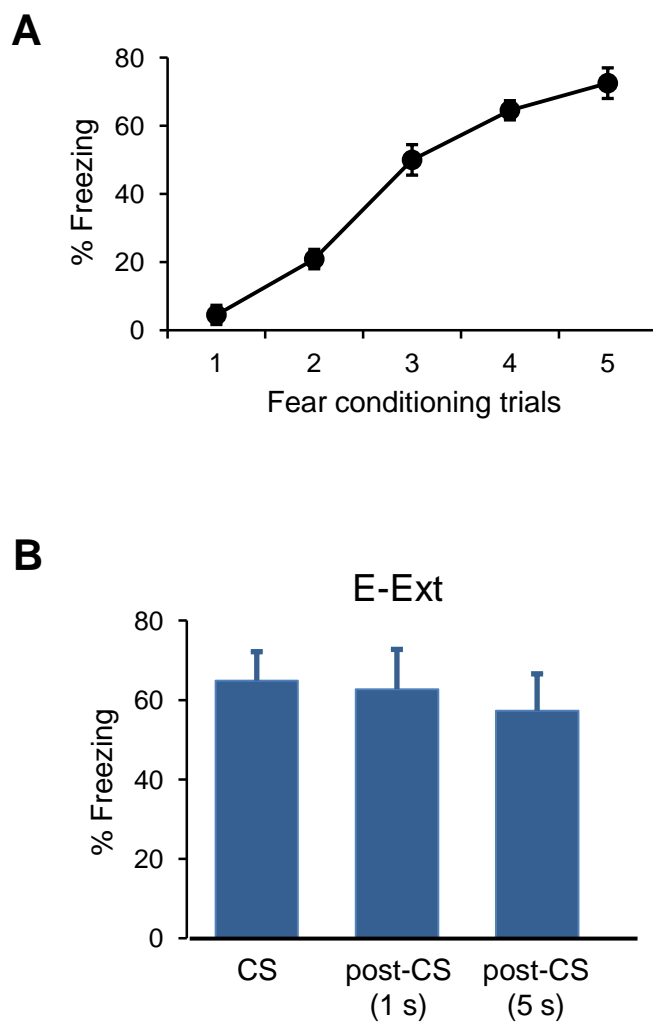

Supplement: supp [file elife-38818-supp-v1.zip]

**Figure 5—figure supplement 2**

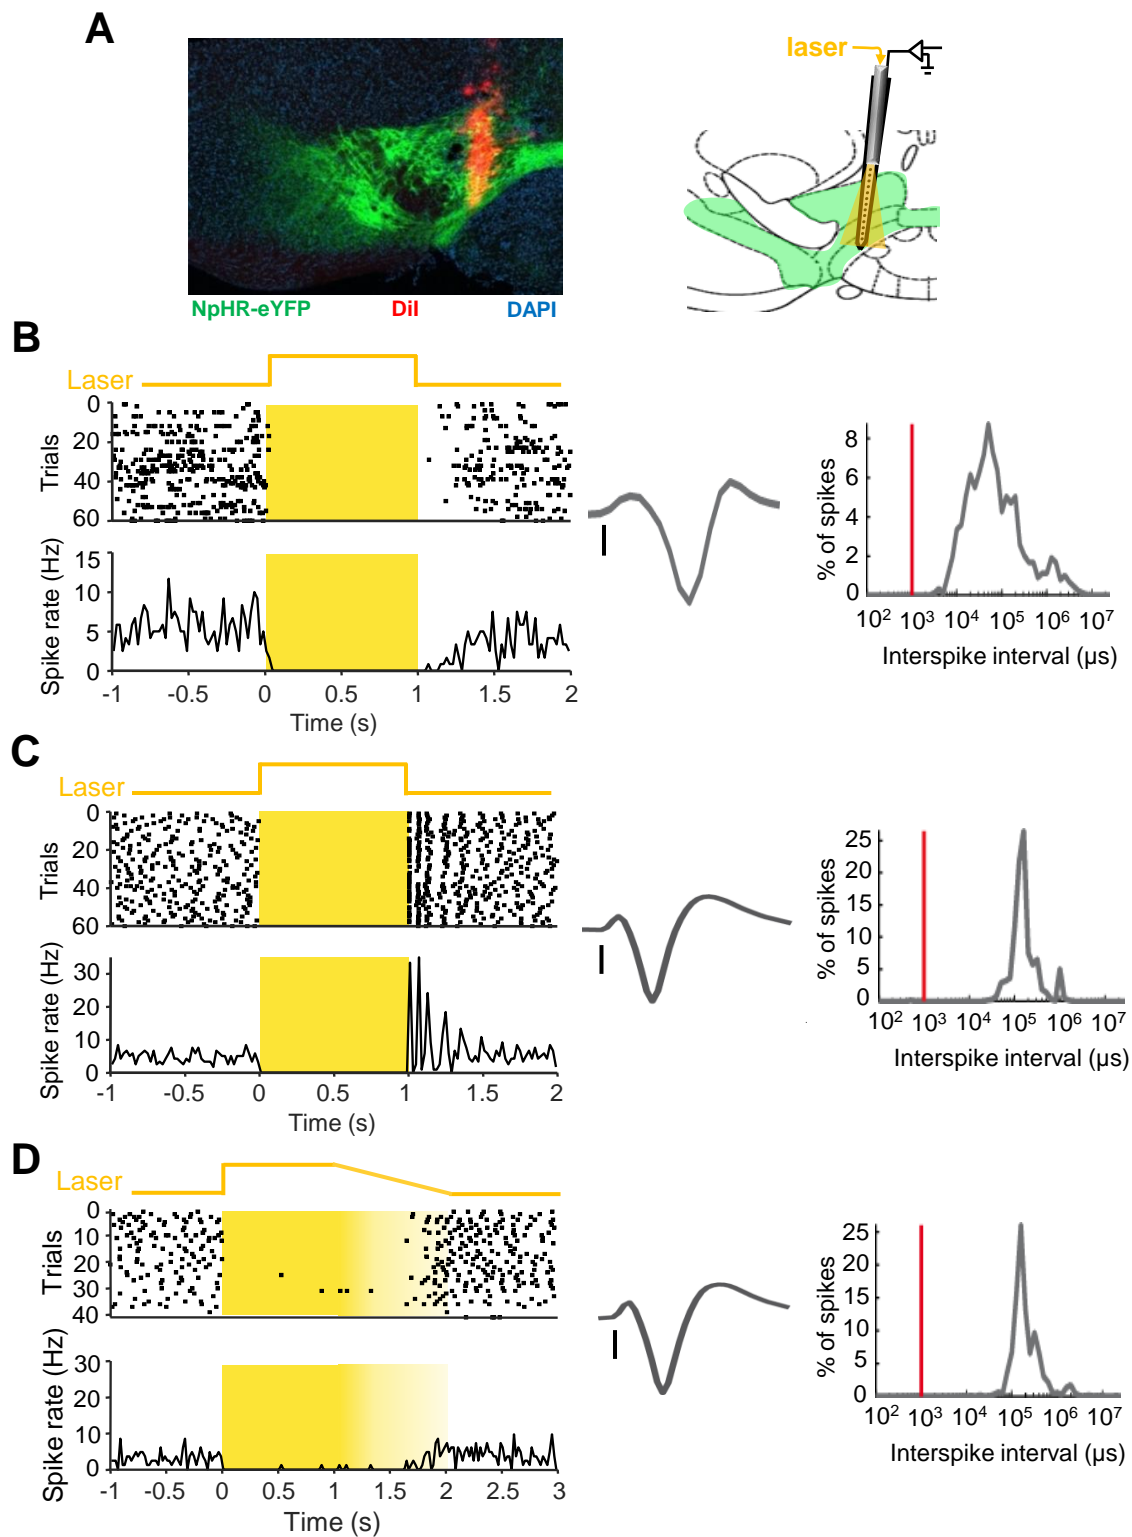

Supplement: supp [file elife-38818-supp-v1.zip]

**Figure 5—figure supplement 1**

**A**

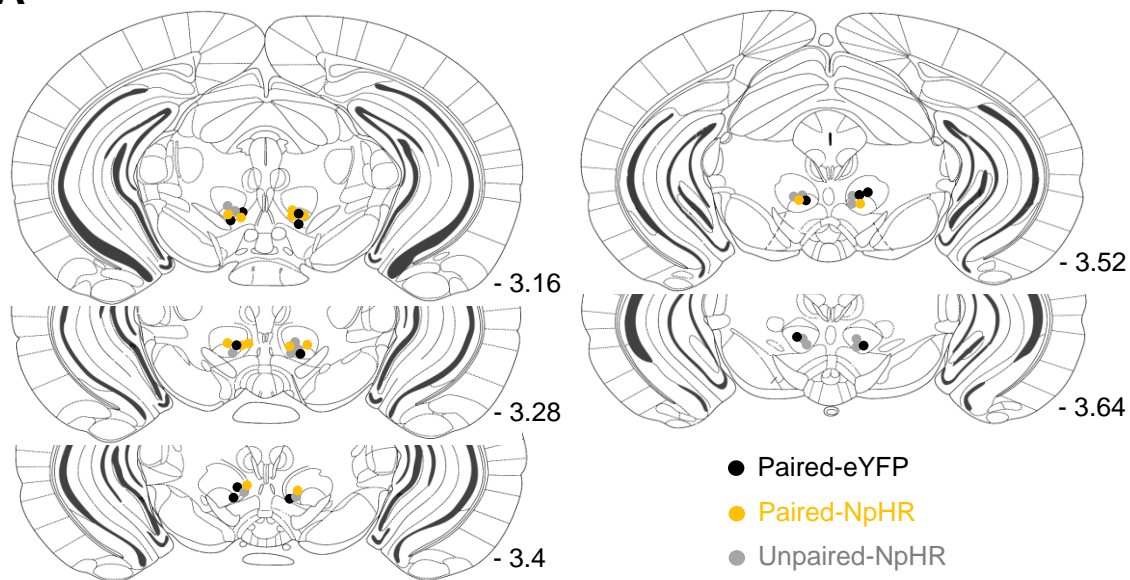

**B**

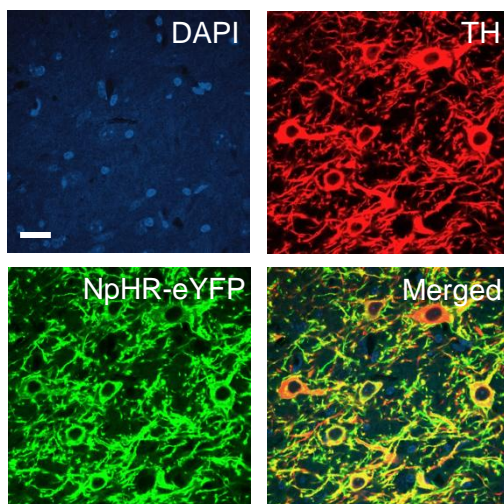

**C**

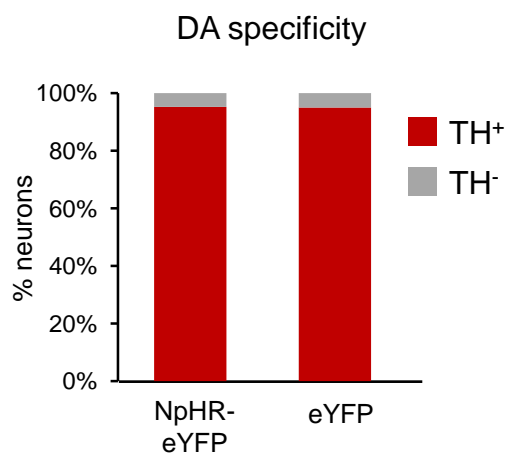

Supplement: supp [file elife-38818-supp-v1.zip]

**Figure 6—figure supplement 3**

DAY 4: Fear Renewal Test ( 5 CS)

**A**

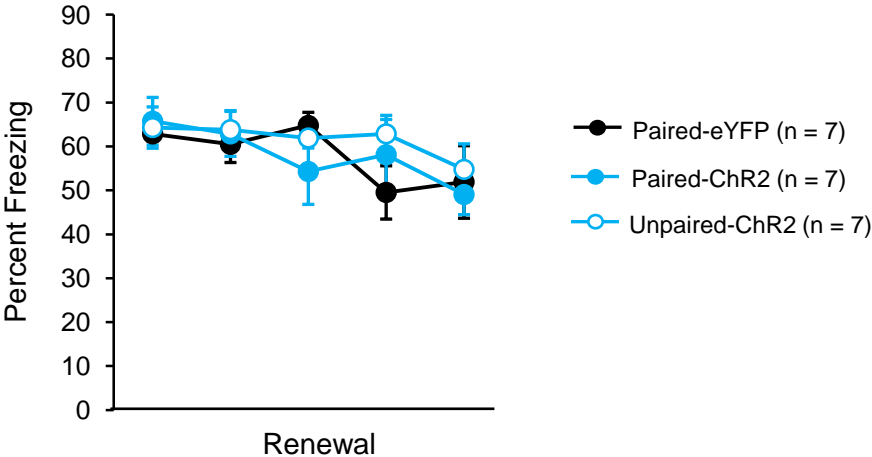

**B**

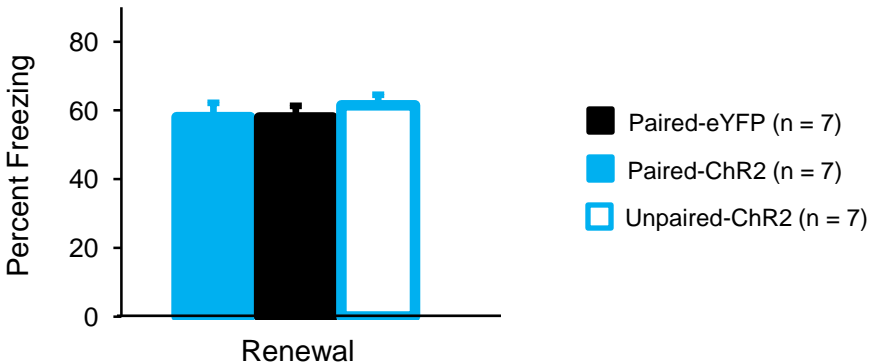

Supplement: supp [file elife-38818-supp-v1.zip]

**Figure 1—figure supplement 4**

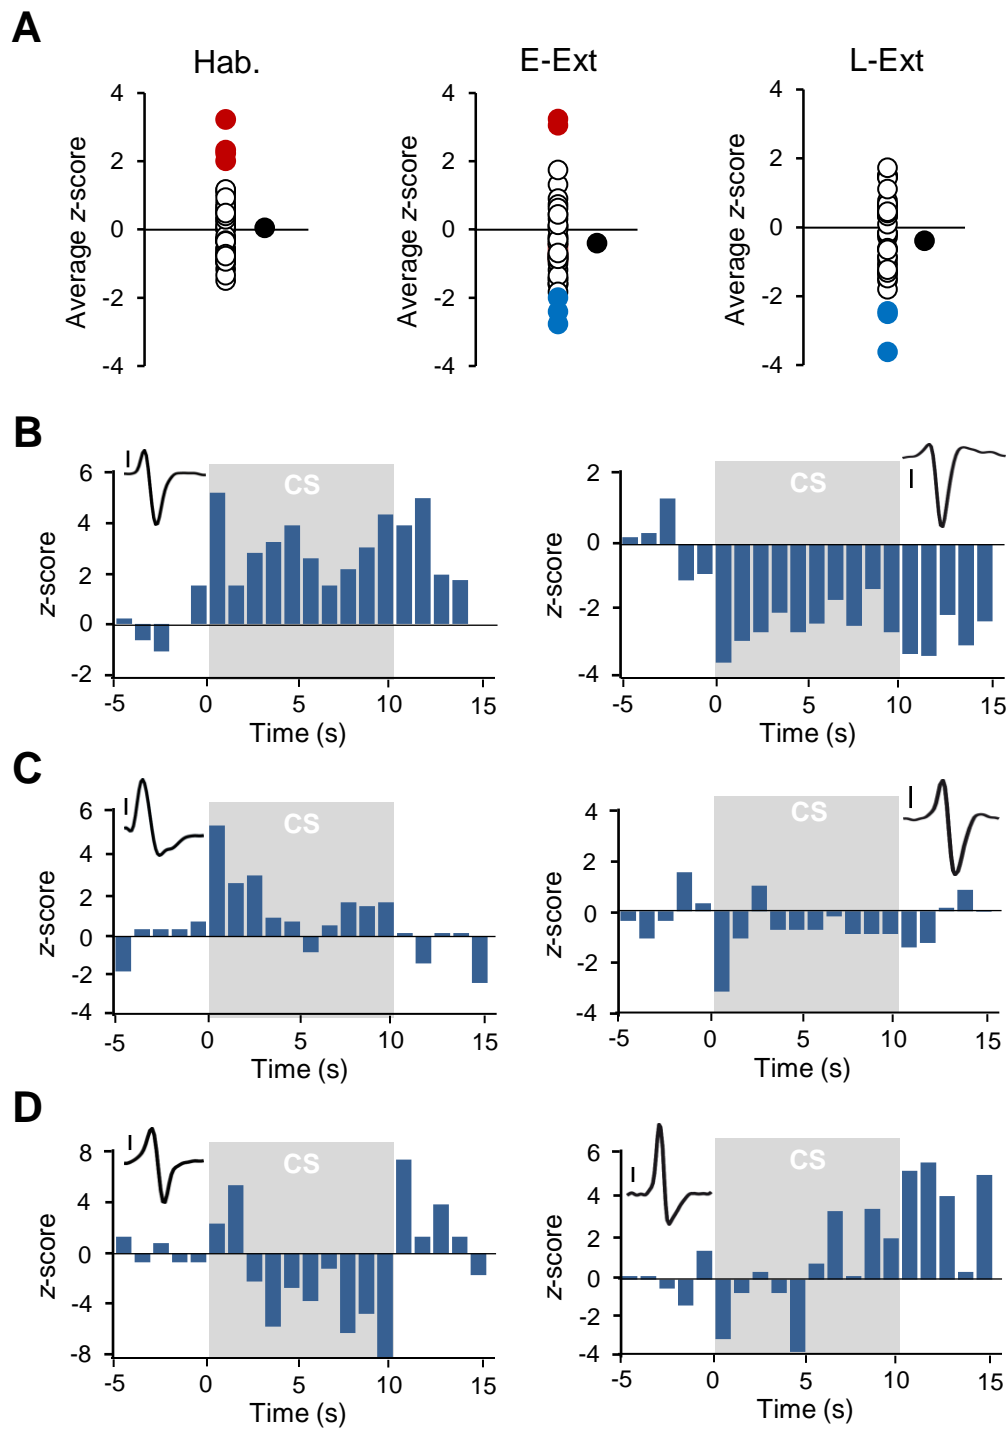

Supplement: supp [file elife-38818-supp-v1.zip]

### Figure 1—figure supplement 3

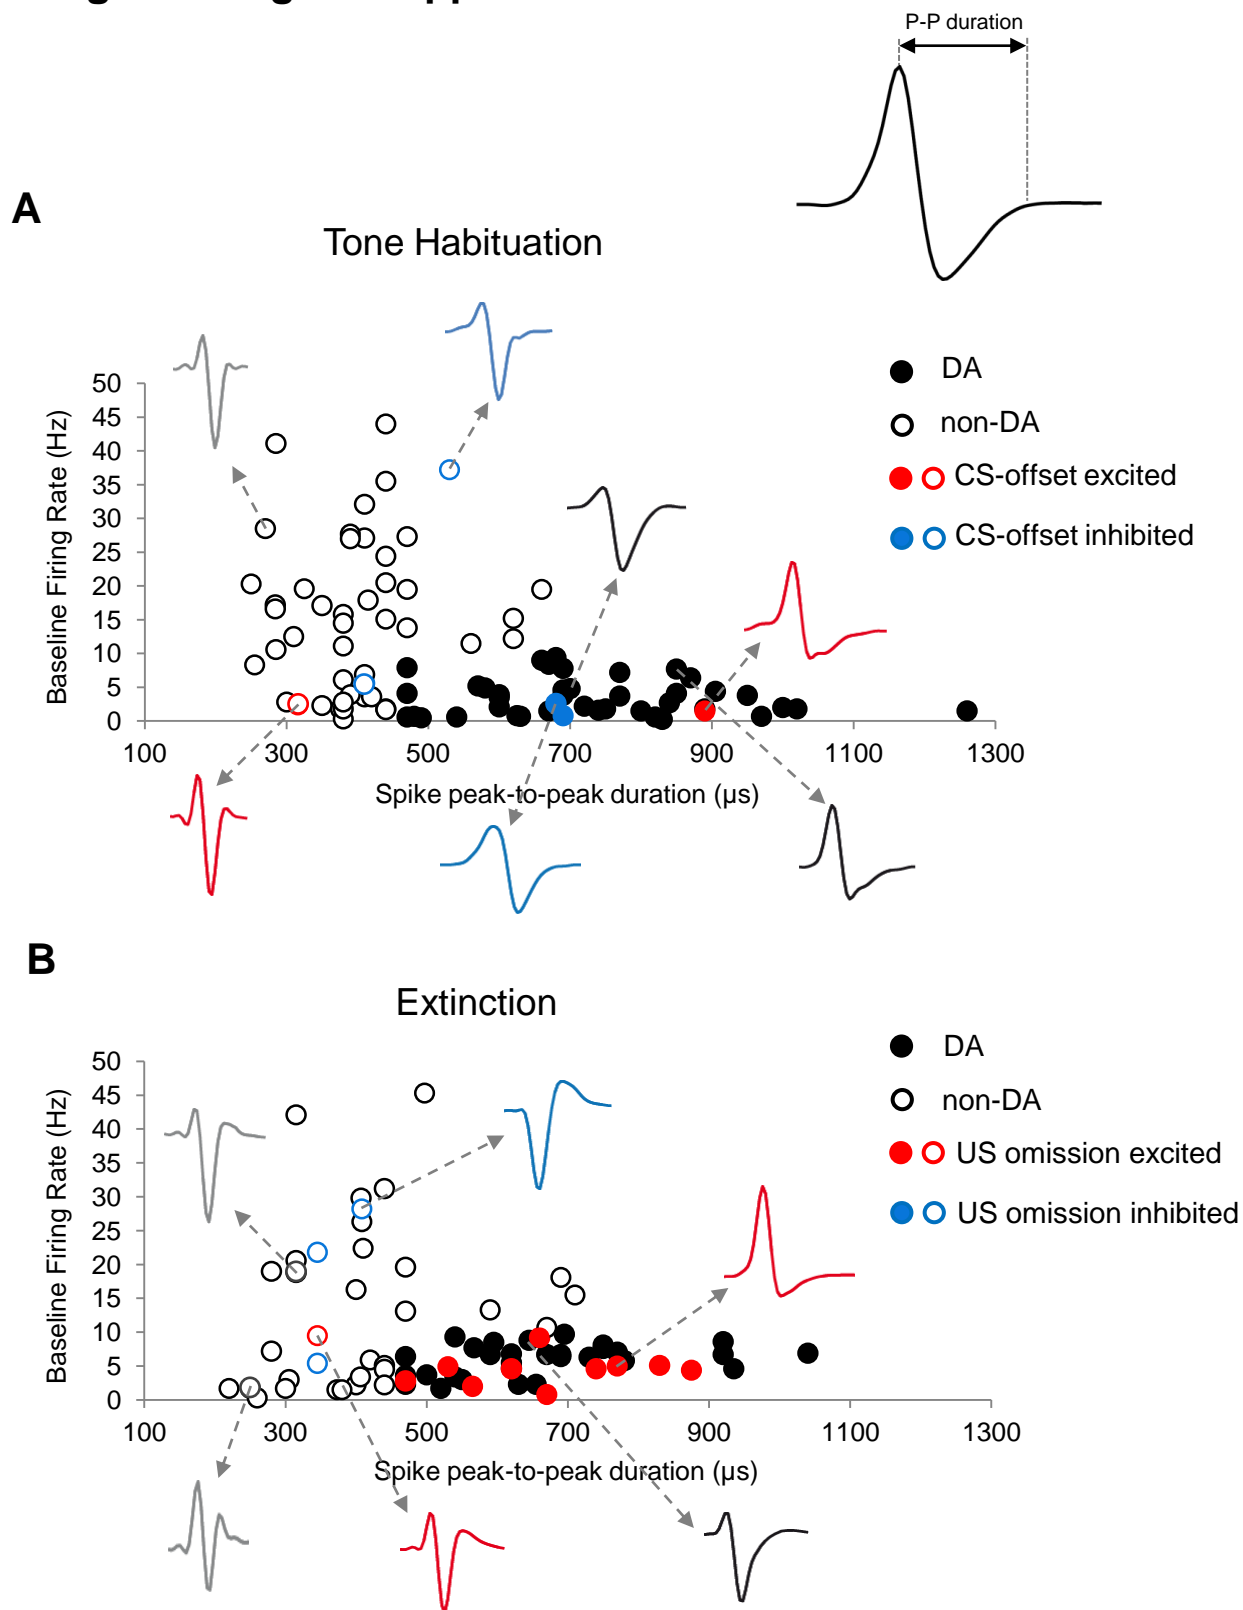

Supplement: supp [file elife-38818-supp-v1.zip]

**Figure 6—figure supplement 1**

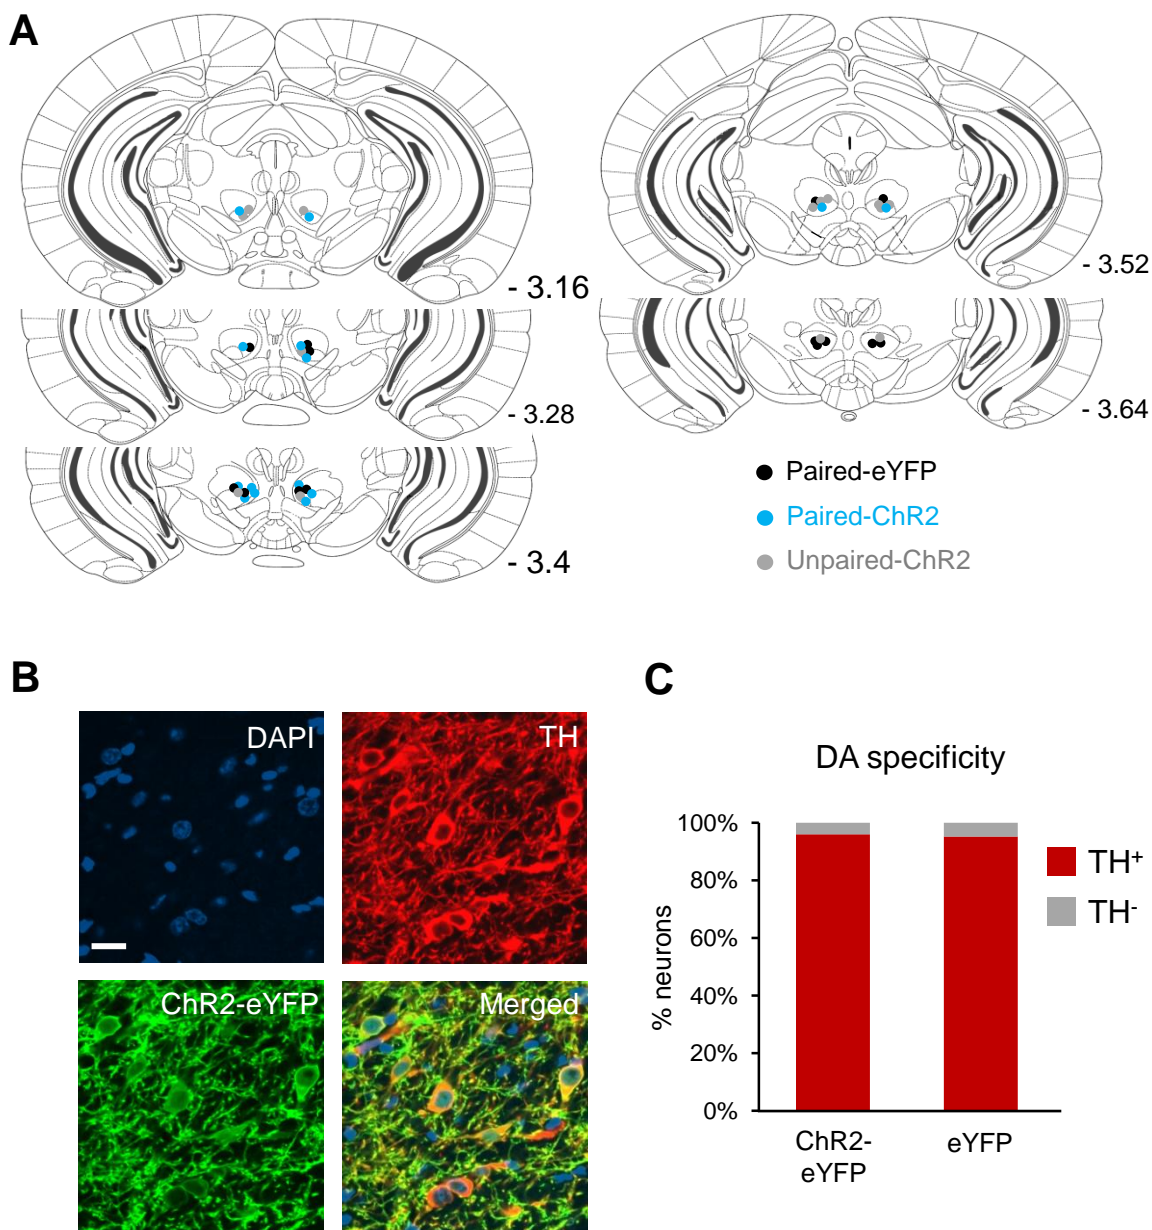

Supplement: supp [file elife-38818-supp-v1.zip]
